# Supplementary material for: Mammographic density is a potential predictive marker of pathological response after neoadjuvant chemotherapy in breast cancer
Source: PubMed Central journal article supplement (PMC6937786; doi:10.1186/s12885-019-6485-4), 2019-12-30
Supplement: 12885_2019_6485_MOESM1_ESM.pdf [file 12885_2019_6485_MOESM1_ESM.pdf]

Additional file 1 Tumor characteristics post chemotherapy according to mammographic density at diagnosis

|                                         |              | BI-RADS <sup>a</sup> a | BI-RADS b  | BI-RADS c   | BI-RADS d   |
|-----------------------------------------|--------------|------------------------|------------|-------------|-------------|
| Number of patients                      |              | 16                     | 120        | 140         | 26          |
| Tumor size (mm)                         | median (IQR) | 18 (0 - 30)            | 8 (0 - 24) | 16 (7 - 30) | 12 (2 - 19) |
| Number of positive axillary lymph nodes | 0            | 8 (50.0)               | 48 (40.0)  | 61 (43.6)   | 9 (34.6)    |
|                                         | 1-3          | 2 (12.5)               | 32 (26.7)  | 44 (31.4)   | 8 (30.8)    |
|                                         | 4≤           | 5 (31.3)               | 36 (30.0)  | 31 (22.1)   | 8 (30.8)    |
|                                         | missing      | 1 (6.3)                | 4 (3.3)    | 4 (2.9)     | 1 (3.8)     |
| Estrogen receptor status                | positive     | 5 (31.3)               | 50 (41.7)  | 81 (57.9)   | 19 (73.1)   |
|                                         | negative     | 6 (37.5)               | 29 (24.2)  | 27 (19.3)   | 2 (7.7)     |
|                                         | missing      | 5 (31.3)               | 41 (34.2)  | 32 (22.9)   | 5 (19.2)    |
| Progesterone receptor status            | positive     | 4 (25.0)               | 33 (27.5)  | 54 (38.6)   | 8 (30.8)    |
|                                         | negative     | 7 (43.8)               | 47 (39.2)  | 54 (38.6)   | 12 (46.2)   |
|                                         | missing      | 5 (31.3)               | 40 (33.3)  | 32 (22.9)   | 6 (23.1)    |
| HER2 status                             | positive     | 1 (6.3)                | 18 (15.0)  | 25 (17.9)   | 3 (11.5)    |
|                                         | negative     | 10 (62.5)              | 61 (50.8)  | 81 (57.9)   | 17 (65.4)   |
|                                         | missing      | 5 (31.3)               | 41 (34.2)  | 34 (24.3)   | 6 (23.1)    |
| Ki67                                    | >20% (high)  | 5 (31.3)               | 31 (25.8)  | 28 (20.0)   | 5 (19.2)    |
|                                         | ≤20% (low)   | 6 (37.5)               | 46 (38.3)  | 71 (50.7)   | 12 (46.2)   |
|                                         | missing      | 5 (31.3)               | 43 (35.8)  | 41 (29.3)   | 9 (34.6)    |

a. Throughout the table BI-RADS breast composition is intended
