# Supplementary material for: Mammographic density is a potential predictive marker of pathological response after neoadjuvant chemotherapy in breast cancer
Source: PubMed Central journal article supplement (PMC6937786; doi:10.1186/s12885-019-6485-4), 2019-12-30
Supplement: 12885_2019_6485_MOESM2_ESM.pdf [file 12885_2019_6485_MOESM2_ESM.pdf]

Additional file 2 Tumor characteristics post chemotherapy according to pathological complete response

|                                         |              | pCR <sup>a</sup>     | Non-pCR      |
|-----------------------------------------|--------------|----------------------|--------------|
| Number of patients                      |              | 57                   | 245          |
| Tumor size (mm)                         | median (IQR) | 0 (0 - 0)            | 17 (10 - 30) |
| Number of positive axillary lymph nodes | 0            | 54 (94.7)            | 72 (29.4)    |
|                                         | 1-3          |                      | 86 (35.1)    |
|                                         | >4           |                      | 80 (32.7)    |
|                                         | missing      | 3 (5.3) <sup>b</sup> | 7 (2.9)      |
| Estrogen receptor status                | positive     |                      | 155 (63.3)   |
|                                         | negative     |                      | 64 (26.1)    |
|                                         | missing      | 57 (100)             | 26 (10.6)    |
| Progesterone receptor status            | positive     |                      | 99 (40.4)    |
|                                         | negative     |                      | 120 (49.0)   |
|                                         | missing      | 57 (100)             | 26 (10.6)    |
| HER2 status                             | positive     |                      | 47 (19.2)    |
|                                         | negative     |                      | 169 (69.0)   |
|                                         | missing      | 57 (100)             | 29 (11.8)    |
| Ki67                                    | >20% (high)  |                      | 69 (28.2)    |
|                                         | <=20% (low)  |                      | 135 (55.1)   |
|                                         | missing      | 57 (100)             | 41 (16.7)    |

a. pathological complete response

b. Three patients with pCR in the breast specimen did not undergo axillary surgery.
