# Supplementary material for: Mammographic density is a potential predictive marker of pathological response after neoadjuvant chemotherapy in breast cancer
Source: PubMed Central journal article supplement (PMC6937786; doi:10.1186/s12885-019-6485-4), 2019-12-30
Supplement: 12885_2019_6485_MOESM3_ESM.pdf [file 12885_2019_6485_MOESM3_ESM.pdf]

Additional file 3 Associations between mammographic density (BI-RADS breast composition) at diagnosis and pathological complete response following neoadjuvant chemotherapy - postmenopausal patients

|         | BI-RADS <sup>a</sup> | N  | N of cases | OR (95% CI)        |
|---------|----------------------|----|------------|--------------------|
| Model 1 | a                    | 7  | 2          | (ref)              |
|         | b                    | 65 | 20         | 1.11 (0.20 - 6.22) |
|         | c                    | 37 | 4          | 0.30 (0.04 - 2.11) |
|         | d                    | 4  | 0          | N/A                |
| Model 2 | a                    | 7  | 2          | (ref)              |
|         | b                    | 65 | 20         | 0.60 (0.09 - 4.09) |
|         | c                    | 37 | 4          | 0.15 (0.01 - 1.54) |
|         | d                    | 4  | 0          | N/A                |
| Model 3 | a                    | 7  | 2          | (ref)              |
|         | b                    | 65 | 20         | 0.31 (0.04 - 2.35) |
|         | c                    | 37 | 4          | 0.17 (0.02 - 1.85) |
|         | d                    | 4  | 0          | N/A                |

a. Throughout the table BI-RADS breast composition is intended

Odds ratio (OR) for pathological complete response (pCR)

Model 1: crude analysis

Model 2: minimally adjusted (age, BMI, pregnancies, HRT) analysis

Model 3: fully adjusted (model 2 + ER, PR, HER2, and tumor size at diagnosis) analysis
